# Supplementary material for: Resource limitation drives spatial organization in microbial groups
Source: PubMed Central journal article supplement — ISME J. 2015 Nov 27;10(6):1471–82. doi: 10.1038/ismej.2015.208 (PMC5029182; doi:10.1038/ismej.2015.208), 2015-11-27
Supplement: ismej2015208x1.pdf [file ismej2015208x1.pdf]

1 **Supplementary Information (SI)**

2 **Supplementary figures**

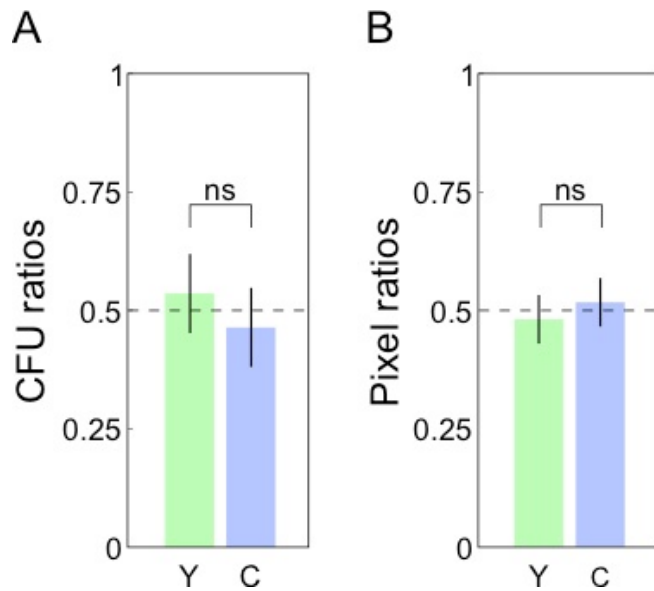

3

4 **Figure S1:** (A) Colonies were scraped from the agar plates after 14 days of growth,  
5 and CFUs of each strain counted. The plot shows the overall ratios from all colonies.

6 (B) Ratios are total green or blue pixels in all colony images on day 14. The ratios in

7 both methods were not significantly different from 0.5 (sign test, both  $P > 0.05$ ).

8

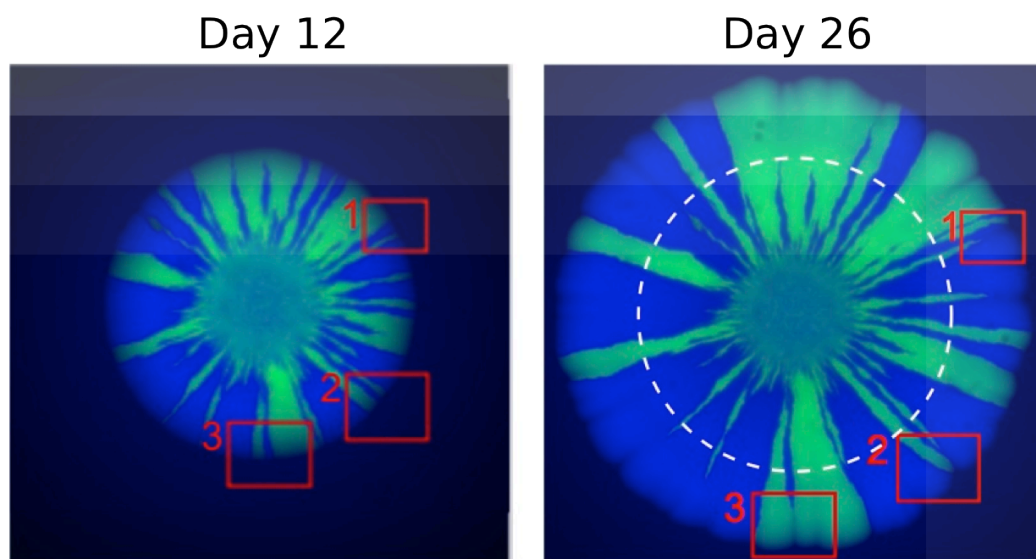

9 **Figure S2:** Same colony at nutrient level 0.15 on day 12 and day 26. Numbered boxes  
10 show corresponding examples of where sectors in the day 12 colony were pinched  
11 off by mutants that had arisen by day 26. We therefore analyse all data on day 12  
12 (dashed circle in the day 26 colony) to minimise the effect of mutations.

13

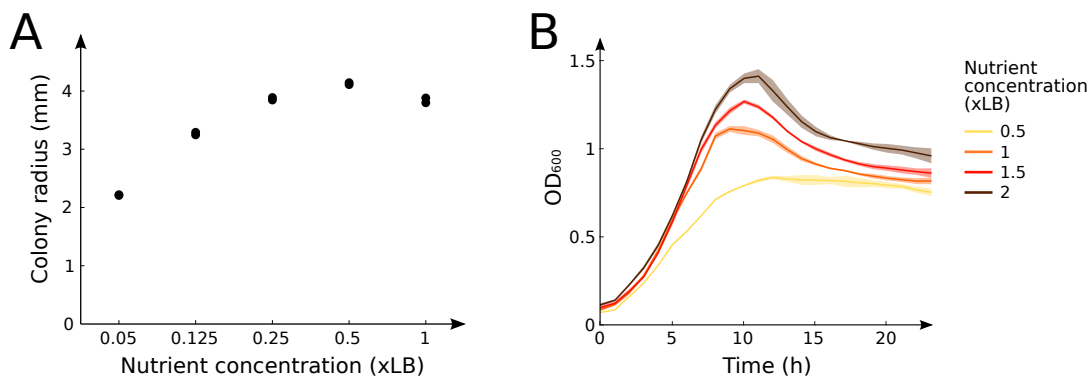

14

15 **Figure S3:** Justifying the choice of nutrient concentrations. (A) Colony radii on day 6  
16 at different nutrient concentrations (2 replicates). Varying nutrient concentration in  
17 agar plates revealed that colony radius increased linearly up to a concentration of  
18 0.25xLB, above which colonies remained approximately the same size or even  
19 decreased in size. (B) OD<sub>600</sub> of YFP strain growing in liquid over 24 hours at different  
20 nutrient concentrations grown at 37°C, where measurements were taken every  
21 hour. Shaded areas show standard deviations between 3 replicates. At nutrient  
22 concentrations of 0.5xLB and higher, optical densities go down after the nutrients  
23 have been exhausted. This is presumably due to changes in pH (Heurlier et al., 2005).  
24 For these reasons, we focused our experiments on the range of 0.025x to 0.2x.

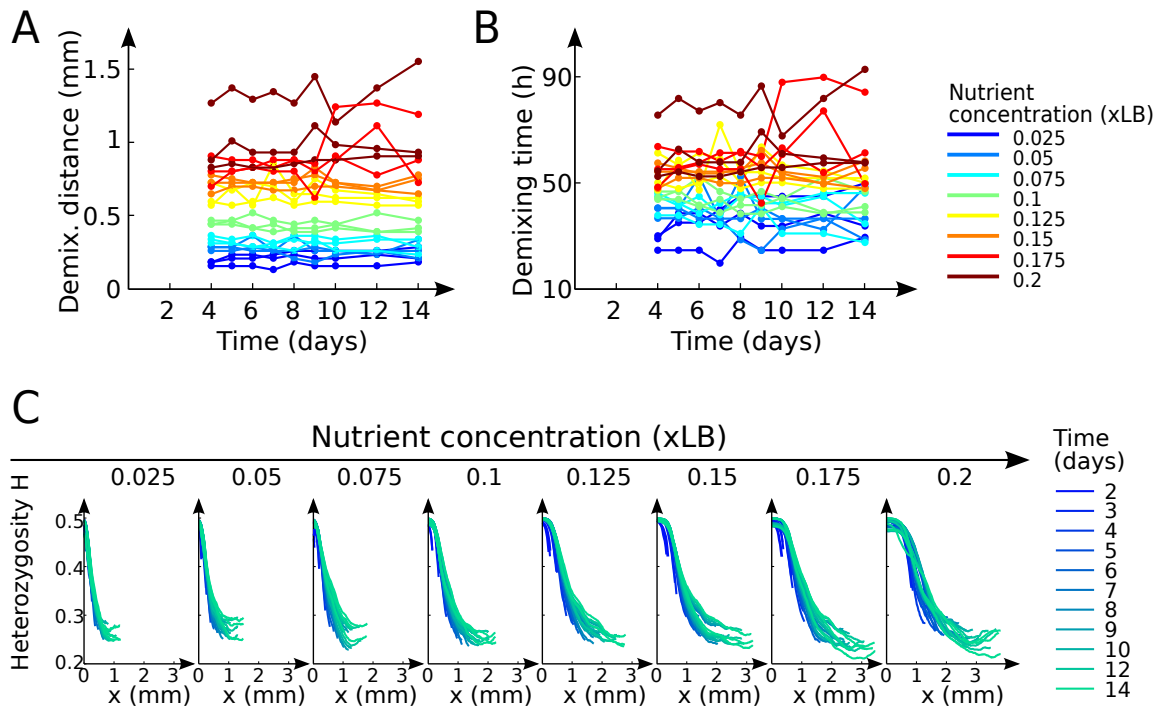

25

26 **Figure S4:** Demixing changes very little over time. (A)-(B) Demixing points in space  
 27 and time did not follow a significant slope between pictures taken on days 4 to 14  
 28 (GLM for demixing distance  $P = 0.33$ ). Before day 4, some of the colonies had not  
 29 demixed, so data was not used. This shows that once the two strains had demixed,  
 30 they remained so. (C) Heterozygosity  $H$  as a function of inoculum distance  $x$  was  
 31 calculated for each colony from pictures taken on different days. Each nutrient  
 32 concentration is represented by images from three replicate colonies. The curves at  
 33 each nutrient concentration fall approximately on top of each other, showing that  $H$   
 34 remains approximately the same between measurements.

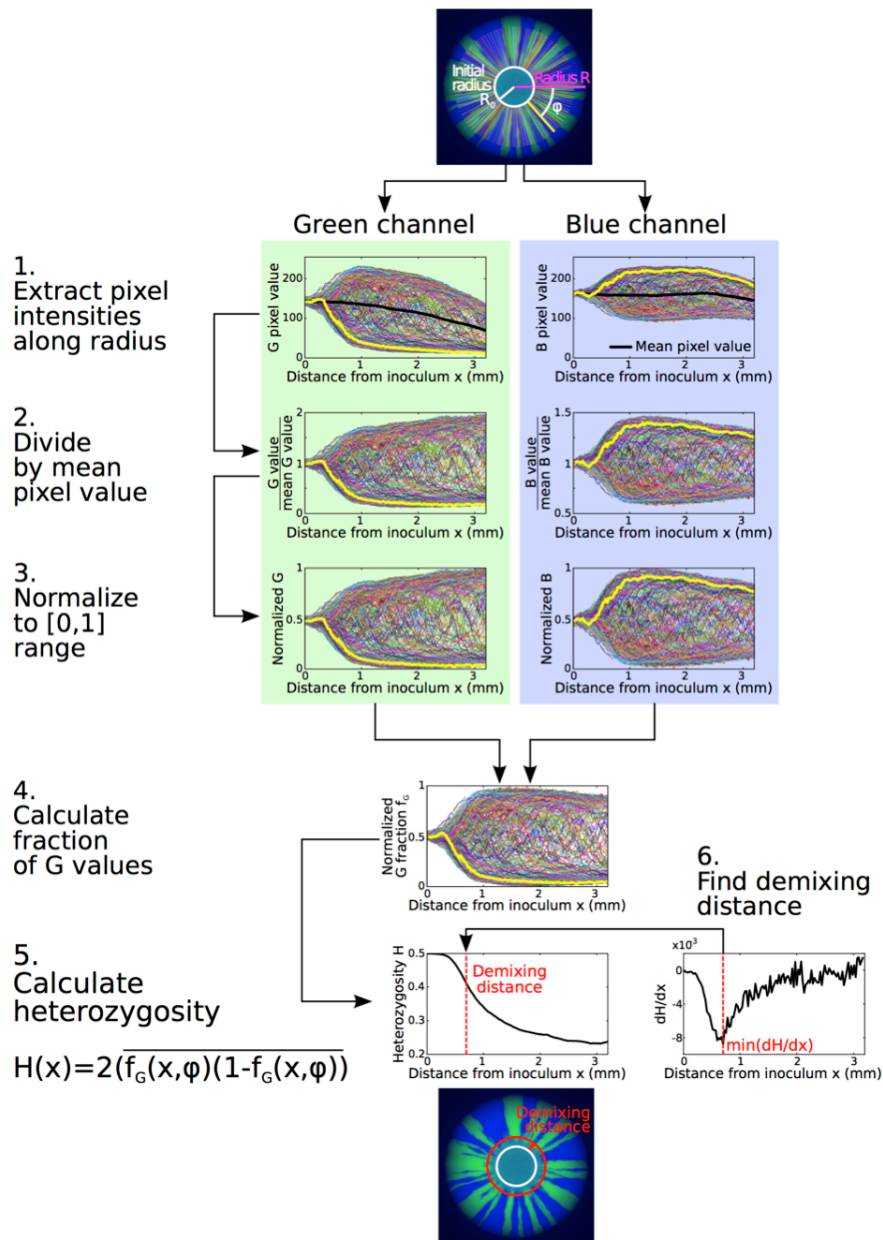

35

36 **Figure S5:** How to calculate heterozygosity index H. (1) Lines were drawn on each  
 37 colony starting from the inoculum and extending outward to 85% of the colony  
 38 radius (beyond that, the colony got darker due to its 3D structure, making it difficult  
 39 to distinguish green and blue) at angles  $\phi$  around the center between  $[-\pi, \pi]$ . We  
 40 then extracted the green and blue pixel intensities along each line at angles  $\phi$  and  
 41 steps of 2 pixels away from the inoculum. (2) Because the range of pixel intensities

42 changed with increasing distance  $x$  from the inoculum, and because it differed  
43 between green and blue, we divided all pixel values by the mean intensity at the  
44 corresponding distance from the inoculum. (3) These values were then normalized  
45 separately for green and blue to a [0..1] range using the following equation:  $(p(x, \phi)$   
46  $- p_{\min}) / (p_{\max} - p_{\min})$  where  $p(x, \phi)$  is the pixel value at distance  $x$  from the inoculum  
47 and angle  $\phi$ , and  $p_{\max}$  and  $p_{\min}$  are the maximum and minimum intensities over all  
48 values of  $p$  in the whole colony. (4) We then calculated the relative intensity of green  
49  $f_G$  at each distance  $x$  and angle  $\phi$  as:  $f_G(x, \phi) = p_G(x, \phi) / (p_G(x, \phi) + p_B(x, \phi))$  where  $p_G$   
50 are  $p_B$  are the normalized green and blue values described in step 3. (5) We  
51 calculated  $H$  for each distance  $x$  as:  $H(x) = 2 [\sum_{\phi} f_G(x, \phi)(1 - f_G(x, \phi))] / \Phi$ ,  
52 where  $\Phi$  is the number of angles sampled around the circumference (here  $\Phi = 315$ ).  
53 (6) The demixing distance was then determined by finding the distance at which the  
54 first derivative of  $H$  ( $dH/dx$ ) was minimal. The logic behind this is that until that  
55 point, the two strains are increasingly demixing and after that point, the pattern  
56 begins to converge on its final sector number  $S$ . Plots (in Fig. 2) show  $H$  as a function  
57 of distance, which is obtained as described above, and as a function of time, which is  
58 calculated by dividing the distance  $x$ -axis by each colony's radial expansion velocity  $v$ .

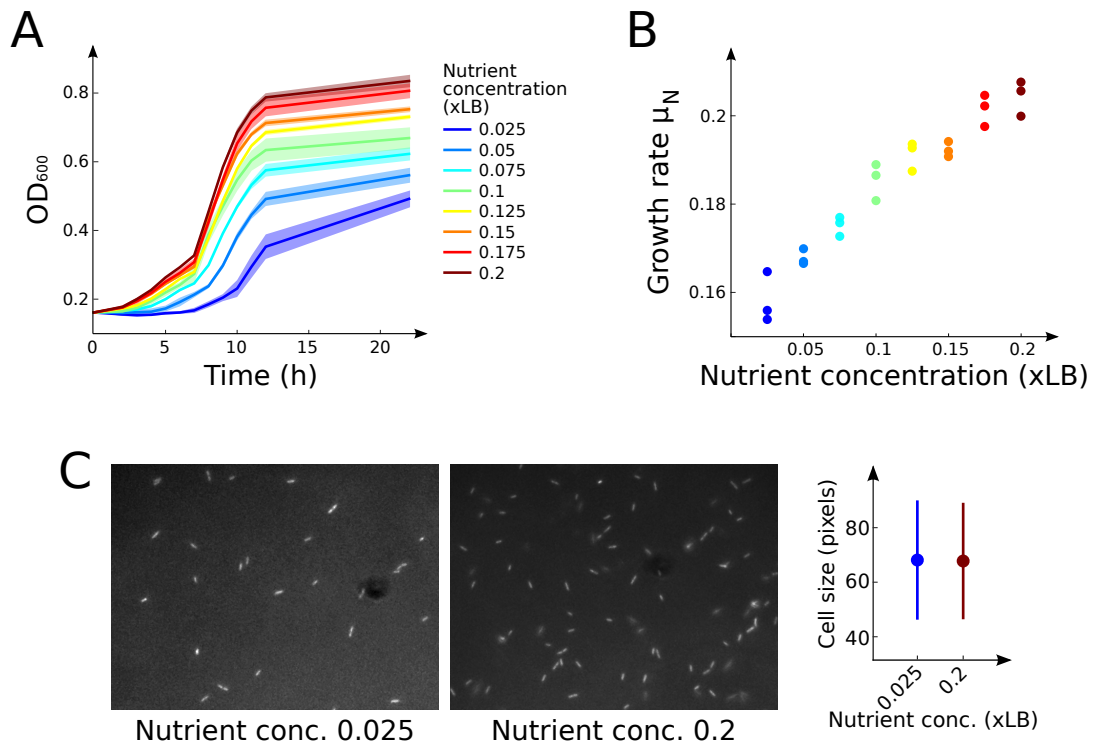

59

60 **Figure S6:** Estimating growth rates  $\mu$  based on growth in liquid at nutrient

61 concentrations  $N$ . (A) OD<sub>600</sub> of YFP strain growing in liquid at 22°C over 24 hours at

62 different nutrient concentrations. Measurements were taken every hour for the first

63 12 hours and once at 24 hours. Shaded areas show standard deviations between 3

64 replicates. These growth curves were used to estimate growth rates  $\mu_N$ , shown in

65 panel (B) by computing the slope between the OD<sub>600</sub> values at 0 and 12 hours (see SI

66 text 2). (C) Because OD<sub>600</sub> values depend on cell size, we have verified that cell sizes

67 do not differ significantly between the highest and lowest concentration of LB

68 ( $P=0.91$ ).

69

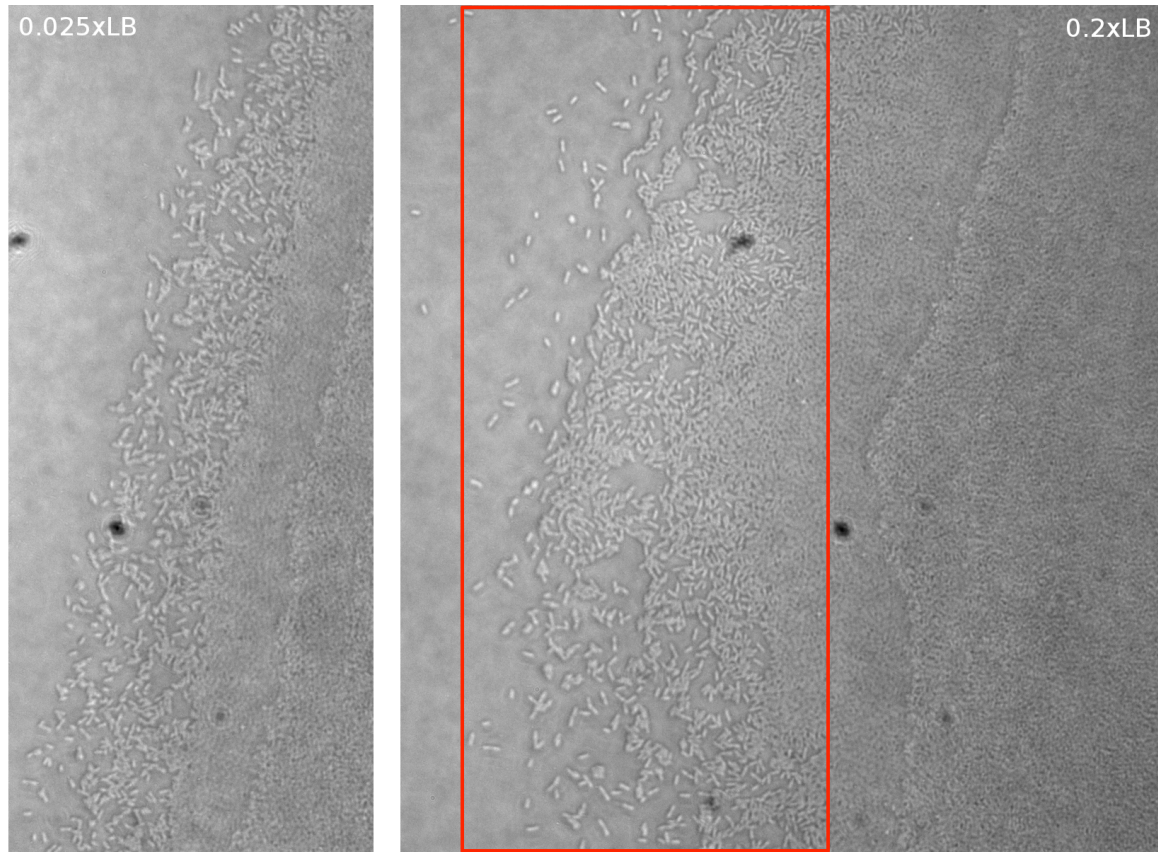

70

71 **Figure S7.** Cell size does not change with nutrient concentration. Brightfield images  
72 of a colony edge at nutrient concentrations 0.025x and 0.2x LB. Image processing to  
73 automatically measure cell size in the left image and the section of the image within  
74 the red box on the right revealed that there was no significant difference between  
75 cell size (mean  $\pm$  sd:  $61.85 \pm 16.21$  and  $63.02 \pm 16.05$  for 0.025x and 0.2x,  
76 respectively, Mann-Whitney test:  $P=0.33$ ).

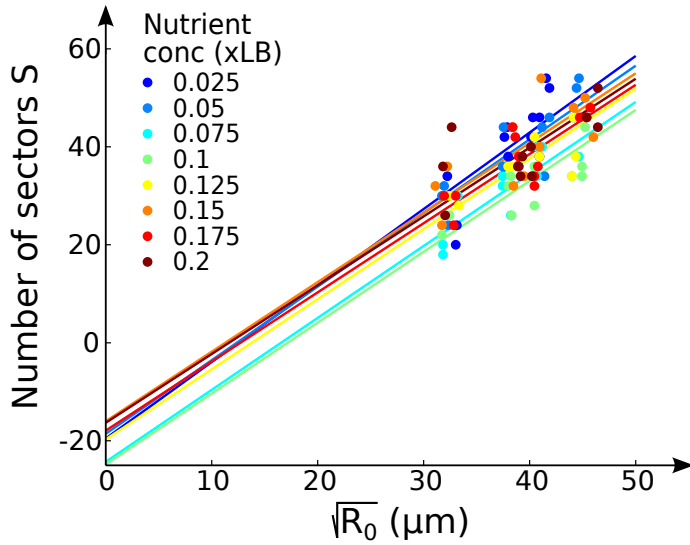

77

78 **Figure S8:** Estimating  $D_g$  from  $S$ ,  $D_s$  and  $R_0$ . According to equation 2, by plotting  
 79 sector number  $S$  against  $\sqrt{R_0}$ , we can fit lines through these points with slope  
 80  $H_0\sqrt{2\pi v/D_s}$  and y-axis intersection  $2\pi H_0 v/D_g$ .  $D_g$  could then be calculated from  
 81 the y-axis intersection.

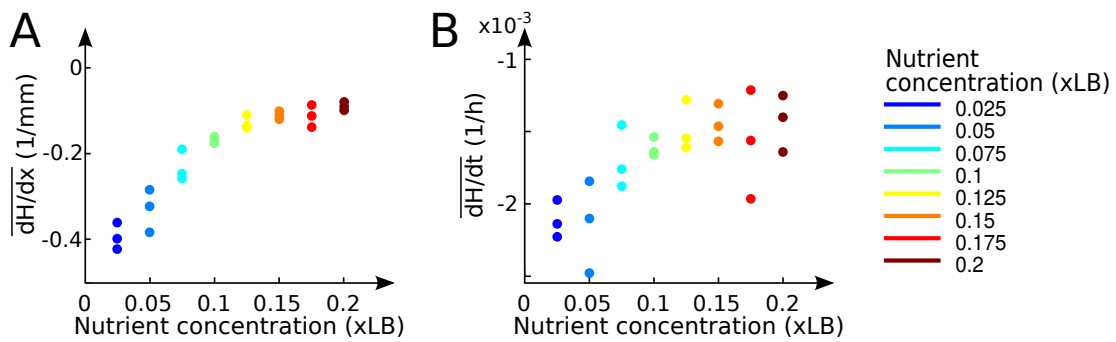

82

83 **Figure S9:** Change in Heterozygosity  $H$  in colonies. (A) The average of the slope of  $H$   
 84 measured over distance  $x$  from the inoculum for all datapoints between  $x = 0$  and  
 85 the demixing distance on day 12. (B) The average of the slope of  $H$  measured over  
 86 time  $t$  for all datapoints between  $t = 0$  and the demixing time, calculated on day 12  
 87 colonies.



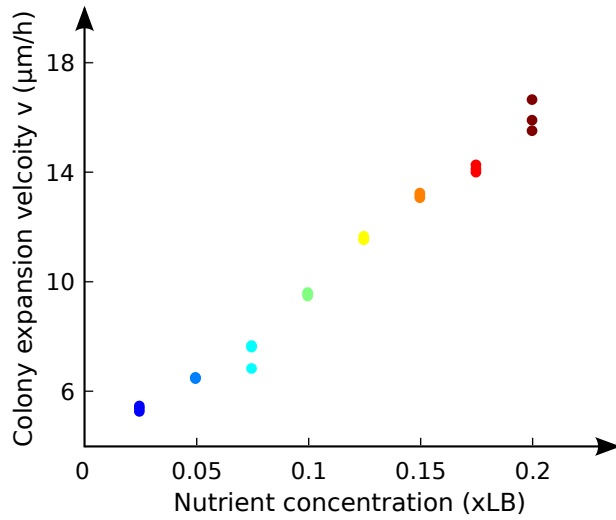

88

89 **Figure S10:** Colony expansion velocity  $v$  as a function of nutrient concentrations.

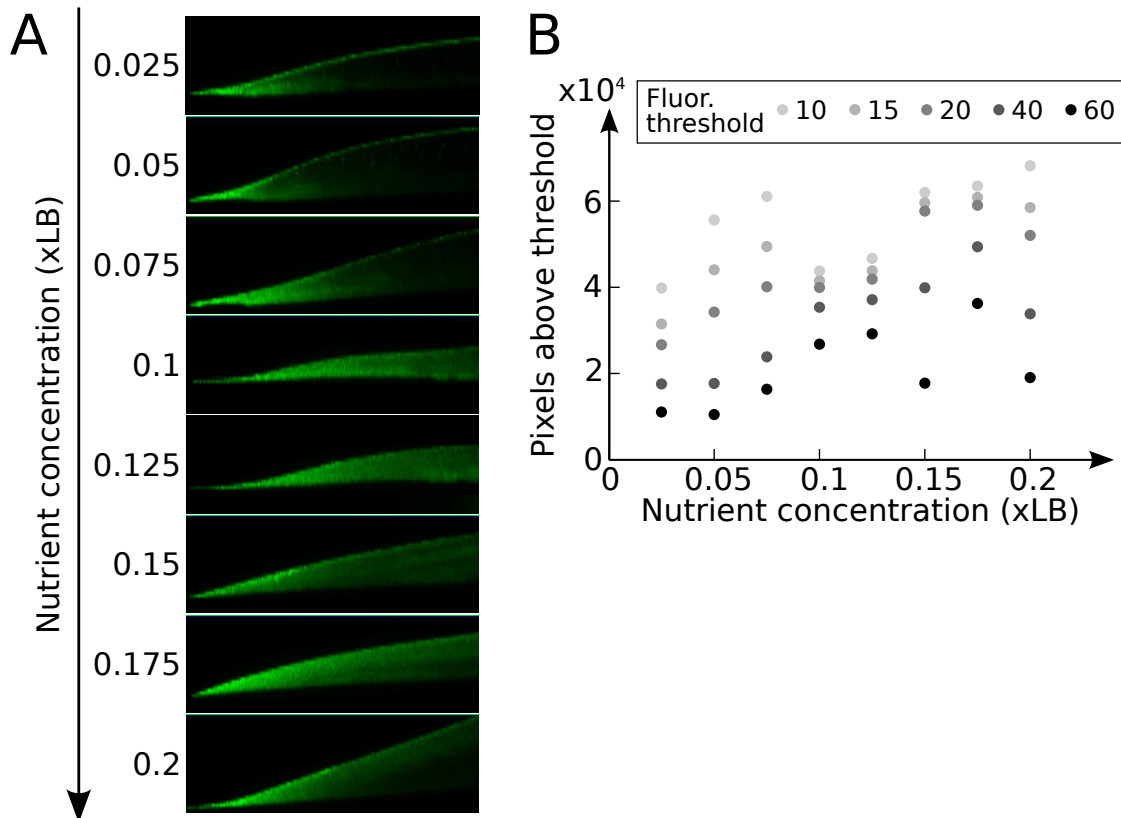

90

91 **Figure S11:** (A) Confocal images of *rrn* colonies at different depths on day 6. One  
 92 replicate was imaged for each nutrient concentration. (B) Number of pixels above a  
 93 given fluorescence threshold in each of the images in panel A. At all thresholds

94 except 60, nutrients and pixels were significantly positively correlated (Spearman's  
 95  $0.74 < \rho < 0.9$ ,  $P < 0.05$ , at threshold 60:  $\rho = 0.71$ ,  $P = 0.058$ ).

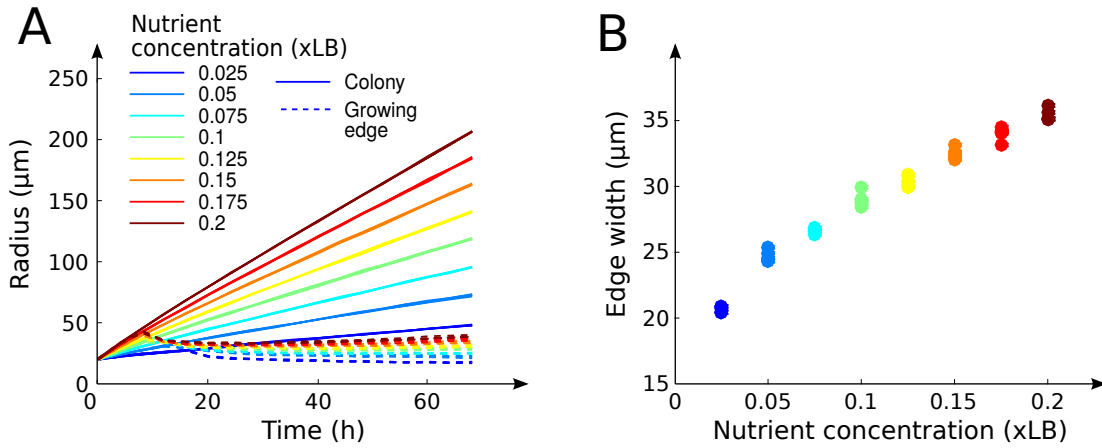

96

97 **Figure S12:** (A) Radii of the simulated colonies, together with the width of the edge  
 98 containing growing cells. Colony radius was calculated as the average of the  
 99 distances between the furthest two cells from the center in both the x and y  
 100 dimensions. (B) Growing edge width as a function of nutrient concentration. This  
 101 width was calculated as the radius of the colony minus the radius of the area  
 102 containing all grid elements whose nutrient concentration was lower than 0.01.

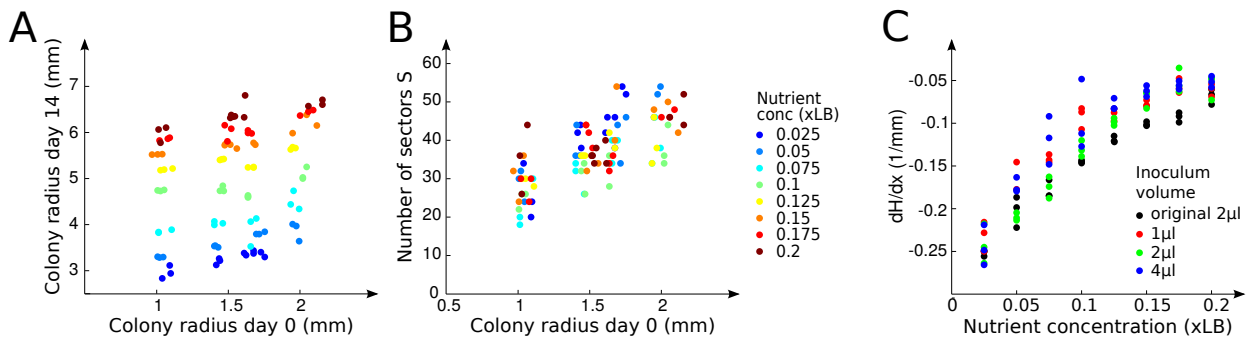

103

104 **Figure S13:** Effects of changing initial radii  $R_0$ . (A) Final colony radius after 14 days as  
 105 a function of initial inoculum size. Colonies were larger with larger inoculum sizes.

106 (B) Number of sectors on day 14 as a function of initial inoculum size. Larger inocula  
 107 resulted in more sectors, but sector number does not vary significantly with  
 108 nutrients. (C)  $dH/dx$  is not significantly affected by  $R_0$  ( $P = 0.9$ ), but is significantly  
 109 affected by nutrient concentrations ( $P < 0.001$ ).

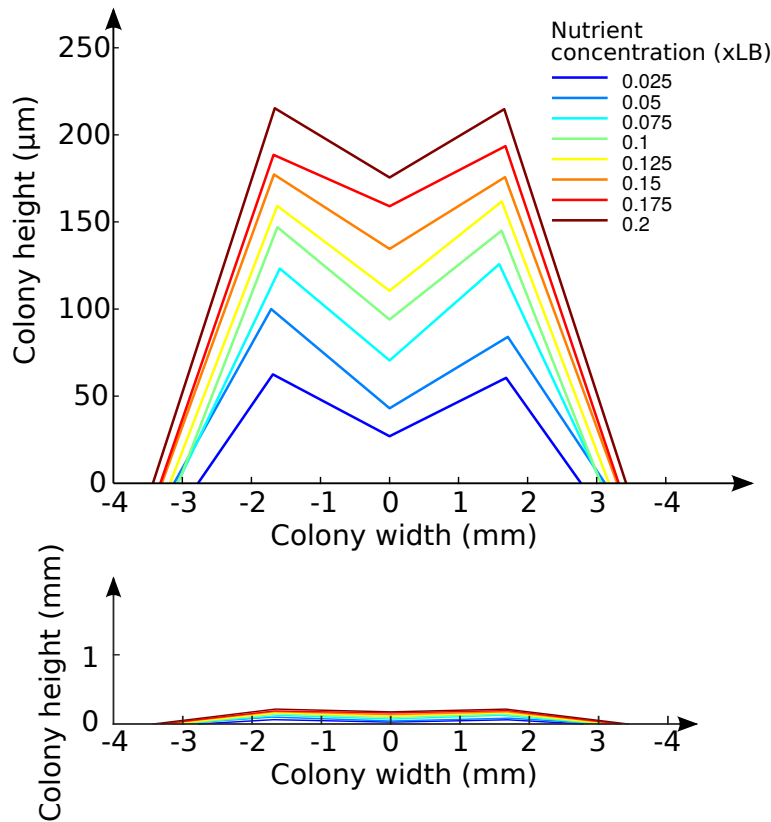

110

111 **Figure S14:** Height of colonies, estimated using confocal microscopy, measuring five  
 112 points along the widest part of the colony. Values of the x-axis were determined by  
 113 the 2D measurements of the colony radius, and the highest points were set to be at  
 114 the initial inoculum radius, where we expect the so-called “coffee-ring effect” of the  
 115 dried inoculum to result in higher cell concentrations at the edge of the drop. The  
 116 bottom plot shows the same data but scaled to match each other.

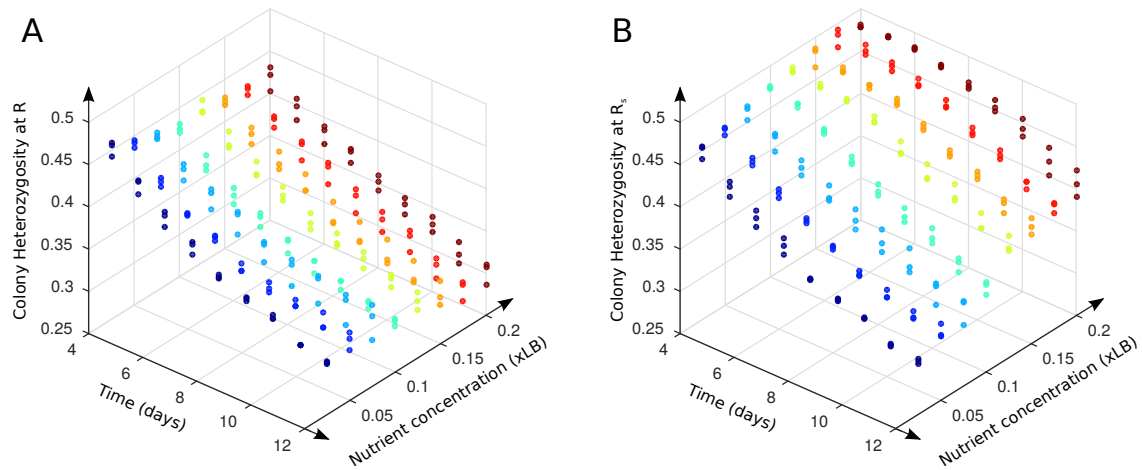

117

118 **Figure S15:** Colony heterozygosity CH measures strain diversity over the whole  
 119 colony. (A) CH is calculated by taking the whole colony, up to the edge of the colony  
 120 R (time-controlled). (B) CH is calculated by taking only part of the colony (from the  
 121 center to  $R_s$ ) where  $R_s$  is the radius of the smallest colony on that day across nutrient  
 122 concentrations (size-controlled). The x-axis shows the day on which the colony  
 123 pictures were taken and the y-axis shows nutrient concentrations. The plot shows  
 124 that size-controlled CH increases with increasing nutrient concentrations, following  
 125 the patterns observed for demixing distance, regardless of the day it is measured on,  
 126 while time-controlled colonies do not vary much, consistent with changes in  $dH/dt$   
 127 with nutrients.

128

129 **Supplementary text 1.** In the main text, we describe experiments to visually quantify  
 130 the width of the growing edge. The data from these experiments are qualitative,  
 131 however, because the fluorescent protein is known to have a half-life of  
 132 approximately 24 hours (Andersen et al., 1998), such that cells will continue to  
 133 fluoresce after they have stopped growing. In addition, colonies became thicker with

134 increasing nutrients (Fig. S14), leading to a higher cumulative fluorescence when  
135 colonies were observed from the top. We therefore also used confocal microscopy  
136 to measure the fluorescence intensities at different depths at the edge of the  
137 colonies. These data support our findings that the area at the edge of the colonies in  
138 which cells are growing correlates positively with nutrient concentrations  
139 (Spearman's  $\rho = 0.9$ ,  $P < 0.005$  between nutrient concentration and number of pixels  
140 with values above 20, Fig. S11).

141

## 142 **Supplementary text 2: Detailed Materials & Methods**

143 **Bacterial strains and isolates.** The following bacterial strains were used in this  
144 study: *P. aeruginosa* PA4, PAO1 wild-type (WT), pili mutants ( $\Delta pilB$ ) and PAO1 wild-  
145 type with an rRNA transcriptional GFP fluorescent reporter built in (*rrn*). The wild-  
146 type PAO1 strain was kindly provided by Roberto Kolter and the knock-out strain  
147 constructed by a clean deletion of the *pilB* gene. The *P. aeruginosa* *rrn* strains were  
148 generously provided by Phil Stewart, who inserted an *rrnBp1*-GFP-AGA plasmid into  
149 a PAO1 background.

## 150 **Cultures and growth conditions**

151 LB agar plates were prepared at 8 different concentrations of LB-Miller, starting at  
152 0.025x and increasing in steps of 0.025x to 0.2x. We did this by increasing the  
153 concentrations of yeast extract (0.125g/l – 1g/l) and tryptone (0.25g/l – 2g/l), while  
154 holding agar and NaCl concentrations constant at 15g/l and 10g/l, respectively. Each  
155 plate contained 25ml of 1.5% LB agar and plates were left to dry (lids on) overnight

156 at room temperature.

157 Liquid cultures of each strain were incubated at 37°C and constantly shaken (250  
158 rotations per minute) overnight in 3ml of 1x LB broth. Fresh 3ml aliquots of 1x LB  
159 were then reseeded with the overnight cultures to an  $OD_{600} = 0.05$  and grown for 2  
160 hours at 37°C, constantly shaken. The YFP and CFP-tagged cultures were then mixed  
161 at a 1:1 ratio in phosphate buffer solution (PBS), resulting in a 1ml mixture at  $OD_{600} =$   
162 0.3. The *rrn* cultures were simply diluted to an  $OD_{600} = 0.3$  in PBS to a total of 1ml.  
163 2 $\mu$ l of the two-strain mixture, or the *rrn* culture, were then spotted onto each agar  
164 plate, left to dry (until the drop was no longer visible) and then turned over. In the  
165 experiment where the initial inoculum radius was varied, drops of either 1 $\mu$ l, 2 $\mu$ l or  
166 4 $\mu$ l were deposited onto the agar. All colonies were left to grow on overturned  
167 plates for 14 days at room temperature (22°C).

168 **Imaging and image analysis.** Colonies were imaged using a stereoscope (Zeiss Lumar  
169 V.12), a 0.5x objective, at zoom 3.5x. Fluorescence exposure (YFP and CFP filter sets)  
170 was automatically adjusted for the mixed colonies and fixed to 150ms for the *rrn*  
171 colonies (YFP). Images were taken 1 hour after the colonies had dried (using dark  
172 field light), and then every 24 hours for the first 10 days, and subsequently every 48  
173 hours.

174 All image analysis was conducted using MatLab R2010a. Colony radii at day 0 ( $R_0$ )  
175 were measured manually. After that, tools provided by the MatLab Image Processing  
176 toolbox were used to automatically trace a line around each colony, (parameters  
177 were fixed through trial and error to yield good estimates of the colony radii). The  
178 distances of each point on the edge of the colony to the central point were then

179 averaged to yield the colony radius.

180 **Estimating experimental parameters.** To calculate  $\mu_N$  for each nutrient  
181 concentration used in the agar plates ( $0.025 < N < 0.2$ ), *P. aeruginosa* cells were  
182 grown in 150 $\mu$ l of shaken liquid culture containing the corresponding nutrient  
183 concentration in a 96-well plate. These cultures were inoculated with cells that had  
184 been grown overnight, diluted to an OD<sub>600</sub> of 0.05, grown for an additional 2 hours,  
185 and subsequently diluted down to an OD<sub>600</sub> of 0.05 to ensure that cells were in the  
186 exponential growth phase. Growth rate  $\mu_N$  was calculated as follows:

$$187 \quad \mu_N = \frac{\log_2(OD_{N,t_2}/OD_{N,t_1})}{t_2 - t_1} \quad (2)$$

188 where  $t_1 = 0$ h and  $t_2 = 12$ h and OD<sub>N,t</sub> was the average OD<sub>600</sub> of three replicate  
189 cultures at time t and nutrient concentration N. OD<sub>600</sub> was measured using a 96-well  
190 plate in a Tecan Infinite® 200 PRO microplate reader. Growth rates were estimated  
191 using YFP cells (Fig. S6) due to the noise in the CFP values.

192 Heterozygosity H was measured using the following algorithm (visualized in  
193 Fig. S5): (1) Lines were drawn on each colony starting from the inoculum and  
194 extending outward to 85% of the colony radius (beyond that, the colony got darker  
195 due to its 3D structure, making it difficult to distinguish green and blue) at angles  $\phi$   
196 around the center between  $[-\pi, \pi]$ . We then extracted the green and blue pixel  
197 intensities along each line at angles  $\phi$  and steps of 2 pixels away from the inoculum.  
198 (2) Because the range of pixel intensities changed with increasing distance x from the  
199 inoculum, and because it differed between green and blue, we divided all pixel  
200 values by the mean intensity at the corresponding distance from the inoculum. (3)

201 These values were then normalized separately for green and blue to a [0..1] range  
 202 using the following equation:  $(p(x, \phi) - p_{\min}) / (p_{\max} - p_{\min})$  where  $p(x, \phi)$  is the pixel  
 203 value at distance  $x$  from the inoculum and angle  $\phi$ , and  $p_{\max}$  and  $p_{\min}$  are the  
 204 maximum and minimum intensities over all values of  $p$  in the whole colony. (4) We  
 205 then calculated the relative intensity of green  $f_G$  at each distance  $x$  and angle  $\phi$  as:  
 206  $f_G(x, \phi) = p_G(x, \phi) / (p_G(x, \phi) + p_B(x, \phi))$  where  $p_G$  and  $p_B$  are the normalized green and  
 207 blue values described in step 3. (5) We calculated  $H$  for each distance  $x$  as:

$$208 \quad H(x) = 2 \left[ \sum_{\phi} f_G(x, \phi) (1 - f_G(x, \phi)) \right] / \Phi \quad (3)$$

209 where  $\Phi$  is the number of angles sampled around the circumference (here  $\Phi = 315$ ).  
 210 (6) The demixing distance was determined by finding the distance at which the first  
 211 derivative of  $H$  ( $dH/dx$ ) was minimal.

212 The overall colony heterozygosity  $CH$  was used to estimate a different  
 213 property: the likelihood of a cell at an arbitrary place in the colony to be in a clonal  
 214 patch. We excluded the inoculum area, since its size is arbitrary. Rather than  
 215 sampling points along the radii of the colony as for heterozygosity  $H$ , we instead  
 216 sampled pixels at equidistant points around circumferences at steps of 2 pixels from  
 217 the inoculum, leading to a set of  $Z$  evenly distributed points. As for  $H$ , we extracted  
 218 the green and blue pixel intensities at each point  $z$ , divided all pixel values by mean  
 219 intensity of all  $Z$  points, normalized them to a range of [0..1]  $(p(z) - p_{\min}) / (p_{\max} - p_{\min})$   
 220 where  $p(z)$  is the pixel value at point  $z$ , and calculated the relative green intensity as:  
 221  $f_G(z) = p_G(z) / (p_G(z) + p_B(z))$  where  $p_G$  and  $p_B$  are the normalized green and blue values.  
 222  $CH$  was calculated as follows:



223  $CH(x) = 2 \left[ \sum_{z=1}^Z f_G(z)(1 - f_G(z)) \right] / Z$  (4).

224 For a time-controlled measure of CH, we took all points Z reaching from the  
 225 inoculum all the way to the outside of the colony at that time-point (e.g. day 12). For  
 226 the size-controlled measure, we determined the radius of the smallest colony at that  
 227 time-point (e.g. day 12) and for each colony used all points Z between the inoculum  
 228 and that radius to calculate CH.

229  $N_e$  was calculated using the following equation:

230  $N_e = \frac{wh_e w_c}{2V_c}$  (5)

231 where  $w$  is the width of the growing edge,  $w_c$  the width of a single cell (here  $w_c =$   
 232  $1\mu\text{m}$ ),  $h_e$  is the height of the colony at the inner point of the growing edge, and  $V_c$  is  
 233 the volume of a single cell (here  $V_c = 1\mu\text{m}^3$ ). To estimate  $h_e$ , we first drew a line from  
 234 the highest point in the colony (measured using confocal microscopy as described  
 235 below, and assumed to be at a distance  $x = R_0$  from the center) to the colony edge  
 236 (at height 0). We then calculated the height of the line at distance  $R - w$  from the  
 237 colony center.

238 The genetic diffusion constant  $D_g$  is inversely proportional to  $N_e$  where  $\gamma$  is some  
 239 constant (Korolev et al., 2010, Nei et al., 1975):

240  $D_g = \frac{\gamma}{N_e}$  (7).

241  $D_g$  could also be estimated from equation 2, using the estimates of  $R_0$ ,  $D_s$  and  
 242  $S$ . By plotting sector number  $S$  against  $\sqrt{R_0}$ , we can fit lines through these points

243 with slope  $H_0\sqrt{2\pi v/D_s}$  and y-axis intersection  $2\pi H_0 v/D_g$  (Fig. S8).

244 The cellular diffusion rate  $D_s$  was estimated by analyzing the edges between  
245 the sectors in the colonies. Edges between sectors were found automatically using  
246 an edge detection package developed by Peter Kovesi (Kovesi). We applied this  
247 algorithm at a distance  $R_0 < R < 0.95 R_c$  from the center, where  $R_c$  is the colony  
248 radius and  $R_0$  is the initial inoculum radius. This allowed us to avoid detecting the  
249 colony edge, and thousands of small edges in the initial inoculum area. Edges shorter  
250 than 15 pixels ( $194.8\mu\text{m}$ ) were discarded to avoid well-mixed areas, particularly close  
251 to the center. This method did not detect all sector edges, but was reliable in  
252 detecting edges between well-formed sectors (Fig. 6B). For each point along each  
253 edge between sectors, we measured the distance  $R$  from the center and angle  $\alpha$   
254 from a horizontal line drawn through the center of the colony, and estimated  $\text{var}(\alpha)$ ,  
255 the variance of the angles along the edge and the distance between the  $1/R_i$  and  
256  $1/R_f$ , where  $R_i$  is the distance between the colony center and the closest point on the  
257 edge, and  $R_f$  the furthest point. Using the following equation:

$$258 \quad \text{var}(\alpha) = \frac{2D_s}{v} \left( \frac{1}{R_i} - \frac{1}{R_f} \right) \quad (6)$$

259 we could then estimate  $2D_s/v$  as the slope of the regression line between  $\text{var}(\alpha)$  and  
260  $1/R_i - 1/R_f$  (Fig. 6). Datapoints were then binned together based on their  $1/R_i - 1/R_f$   
261 value (bin size  $8 \times 10^{-5}$ ) and the mean value of  $\text{var}(\alpha)$  for all points in each bin was  
262 used to calculate the linear regression. All points whose  $\text{var}(\alpha)$  value fell further than  
263 3 standard deviations away from the mean of the points in the bin were discarded,  
264 since they were thought to be cases where the algorithm failed at adequately

265 detecting edges. This reduced the noise in the fit without changing the qualitative  
266 result. A point through the origin was included in the linear regression fit for each  
267 nutrient concentration.

268 Confocal laser scanning microscopy (CLSM) was conducted using an LSM 700  
269 laser scanning inverted confocal microscope (Zeiss). Squares of agar were cut around  
270 the colony, which was placed on a microscope slide for imaging.  $\Delta$ pilB colonies were  
271 imaged with automated exposure, whereas rrn colonies were imaged at a fixed  
272 exposure 150ms. One  $\Delta$ pilB colony (nutrient concentration 0.2x on day 7) was  
273 imaged along the edges of a sector using a 50x objective to verify that patterns at  
274 the surface were representative of cells growing deeper below the surface (Fig. 1D).  
275 3D images were rendered using the Zen Black software. rrn colonies were used to  
276 determine the level of fluorescence at the edge, and to calculate colony profiles  
277 along the z-axis. This was done by imaging the edge of each colony with slices 2 $\mu$ m  
278 apart along the z-axis, and, moving sideways along the colony diameter, also imaging  
279 the highest point in the colony, the center, the next highest point and the opposite  
280 edge. By using the heights of the highest slice within these five measurements, we  
281 could estimate the profile of the colony (Fig. S14).

282 **Computational model.** Compared to previously published studies using this model,  
283 the initial positioning of the cells and the boundary conditions were as follows: 200  
284 cells were placed at the center of a square space, containing nutrients at a given  
285 concentration (0.375x,  $x = [1, 2, \dots, 8]$ ). When nutrient gradients were allowed to  
286 form, each cell's growth reduced the concentration of nutrients in its grid element.  
287 Grid elements containing no cells (e.g. at the outside of the square) were kept at a

288 constant concentration of nutrients, which could diffuse toward other grid elements.  
289 When nutrient gradients were off, nutrient concentrations were simply kept  
290 constant in all grid elements.

291 Compared to previous publications, we also modified the following parameters:  
292 maximum growth rate  $\mu_{\max}$  was changed from 1 to 1.0152 (as experimentally  
293 measured, see below), the half-saturation constant for nutrient concentration  $K_N$   
294 was changed from  $3.5 \times 10^{-5}$  to 1.5 (as experimentally measured), nutrient diffusion  
295 was reduced from  $4 \times 10^4 \mu\text{m}^2/\text{h}$  to  $200 \mu\text{m}^2/\text{h}$  such that gradients could form at the  
296 edges relatively soon (this was adjusted by trial an error to obtain results that were  
297 qualitatively similar to the real colonies), and the duration of each run, which was  
298 fixed to 72 hours in the runs with nutrient gradients (chosen to reveal differences  
299 between the colonies). In runs with no gradients, simulations were stopped when  
300 the same biomass as the corresponding gradient simulations had been reached.  
301 Stoichiometry equations describing cell metabolism were as in Table S2 in ref. (Mitri  
302 et al., 2011). Even though some parameters were estimated experimentally,  
303 comparisons with the experimental data should only be qualitative.

304 **Simulated colony analysis.** Colony radius  $R$  was calculated as the average of the  
305 distances between the furthest two cells from the center in both the  $x$  and  $y$   
306 dimensions. The width of the growing edge  $w$  was calculated as the radius of the  
307 colony minus the radius of the area containing all grid elements whose nutrient  
308 concentration was lower than 0.01.

309 To calculate heterozygosity  $H$  for simulated colonies, the region of the colony  
310 beyond the initial inoculum was divided into bands of  $5 \mu\text{m}$  width, at increasing

311 distances  $x$  from the inoculum. In each band, 22 equidistant points were marked  
312 around the circumference, and a box of width  $5\mu\text{m} \times 5\mu\text{m}$  sampled around each  
313 point. The number of green and blue cells were then counted in each of these  
314 sections to yield the proportion of green cells  $f_G$ . We then used equation 3 to  
315 compute  $H$  by averaging over sections sampled in each band. The demixing distance  
316 was determined – as in the experiments – as the point in space where the maximum  
317 magnitude of the slope of  $H$  was reached.

318 **Estimating simulation parameters.** The maximum growth rate  $\mu_{\text{max}}$  used in the  
319 simulations was estimated experimentally as for  $\mu_N$  (see above) in a liquid culture  
320 containing 2xLB ( $N=2$ ). This value was found to be 1.0152 cell division per hour.  $K_N$   
321 was computed by fitting a Monod curve through the estimated growth rates at  
322 different nutrient concentrations ( $\mu_N$  and  $\mu_{\text{max}}$ ) using the Matlab curve fitting tool.  
323 The fit estimated that half the maximum growth rate was reached at 0.1xLB.  
324 Nutrient concentrations in the simulations ranged from 0.375 to 3 in steps of 0.375.  
325 This was based on the total concentration of yeast extract and tryptone in g/l, such  
326 that 0.025xLB corresponded to 0.125g/l of yeast extract and 0.25g/l of tryptone  
327 (total: 0.375) and 0.2xLB was taken to contain a total nutrient concentration of 3g/l.

328

## 329 **References**

330

331 Andersen JB, Sternberg C, Poulsen LK, Bjorn SP, Givskov M & Molin S. (1998).

332 New unstable variants of green fluorescent protein for studies of

333 transient gene expression in bacteria. Applied and environmental  
334 microbiology 64: 2240-6.

335 Heurlier K, Haenni M, Guy L, Krishnapillai V & Haas D. (2005). Quorum-sensing-  
336 negative (lasr) mutants of pseudomonas aeruginosa avoid cell lysis and  
337 death. Journal of bacteriology 187: 4875-4883.

338 Korolev KS, Avlund M, Hallatschek O & Nelson DR. (2010). Genetic demixing and  
339 evolution in linear stepping stone models. Reviews of modern physics 82:  
340 1691-1718.

341 Kovesi PD Matlab and octave functions for computer vision and image  
342 processing. Centre for Exploration Targeting, School of Earth and  
343 Environment, The University of Western Australia.

344 Mitri S, Xavier J & Foster K. (2011). Social evolution in multispecies biofilms.  
345 PNAS 108: 10839-46.

346 Nei M, Maruyama T & Chakraborty R. (1975). The bottleneck effect and genetic  
347 variability in populations. Evolution 29: 1-10.

348

349
